# Supplementary material for: A point-of-care testing platform for on-site identification of genetically modified crops
Source: Royal Society of Chemistry journal article supplement (doi:10.1039/d4lc00040d), 2024-01-01
Supplement: d4lc00040d1.pdf [file d4lc00040d1.pdf]

## Supporting Information

### **A point-of-care testing platform for on-site identification of genetically modified crops**

*Yangyang Wang, Furui Yang, Yingyi Fu, Xin He, Haowei Tian, Lili Yang, Mengxi Wu\**,

*Jijuan Cao\* and Junshan Liu\**

\*Corresponding author. Email: mengxiwu@dlut.edu.cn (M. Wu), caojijuan@dlnu.edu.cn (J. Cao), liujun@dlut.edu.cn (J. Liu)

#### **This PDF file includes:**

**Note S1**  
**Figure S1**  
**Table 1**

## **Note S1. Materials and Methods**

*Chip preparation.* Microfluidic chips were manufactured by CNC engraving and milling machine (Beijing Jingdiao Group, JDPMT 400) using a standard milling process. Milling out each reaction chambers on a 3mm thick PC plate and drilling through ventilation holes on a 0.5mm thick COC material. A pressure-sensitive adhesive (PSA) is used to (Adhesive Research, Beijing, China) bond the PC and COC plate. For each experiment, 3 microfluidic chips were utilized to ensure the reproducibility of the results.

*Paraffin preparation.* There were two kinds of paraffin. The sterile liquid paraffin wax was used in the contact area of slide plate and substrate plate (GS070, Qingdao Hope Bio-Technology Co. Ltd., China). The other was a low-melting paraffin wax used for primer sealing, which used a mixed mass ratio of 1:2.2 between the solid and the above liquid paraffin. The melting point was about 38 degrees, and the solid paraffin was sliced paraffin with the original melting point of 48-52 degrees Celsius (69018961, Sinopharm Chemical Reagent Co. Ltd., China).

*Plasmid.* A virus DNA/RNA extraction kit (Magnetic Beads Based) by Vazyme company (Nanjing, China) was used to extract the DNA from the sample. A Warmstart colorimetric LAMP 2X Master Mix (BioLabs, New England) was used to perform the amplification reaction. WSSV and CGMMV positive plasmid were synthesized by TaKaRa (Dalian, China). All assays were prepared using Dnase/Rnase-free water (Aladdin).

*Primer Design.* The primers were designed by Dalian Minzu University, and synthesized by TaKaRa (Dalian, China), and their sequences are listed in Table 1, Supporting Information. Primers and probes for the specific amplification of CGMMV and WSSV were designed using Primer 5.0 software, and their specificity was evaluated with Basic Local Alignment Search Tool (BLAST) available at the NCBI website.

*Assay preparation.* For LAMP assays, a standard reaction volume of 25 $\mu$ L was used. This volume consisted of primer mix (10 $\times$ ), master mix (2 $\times$ ), Dnase/Rnase-free water (dH<sub>2</sub>O) and DNA sample. The assays were incubated at 65 $^{\circ}$ C for different times to observe the color change of different samples over time. The platform reaction was performed in a final volume of 50 $\mu$ L including, 25 $\mu$ L WarmStart Colorimetric LAMP 2X Master Mix, 5 $\mu$ L LAMP Primer Mix and 16 $\mu$ L dH<sub>2</sub>O. The nucleic acid extraction part includes 2 $\mu$ L proteinase K, 2 $\mu$ L magnetic bead, 60 $\mu$ L lysis solution, 2 $\mu$ L target sample, 70 $\mu$ L washing buffer 1, 70 $\mu$ L washing buffer 2 and 4 $\mu$ L elution buffer.

**Figure S1**

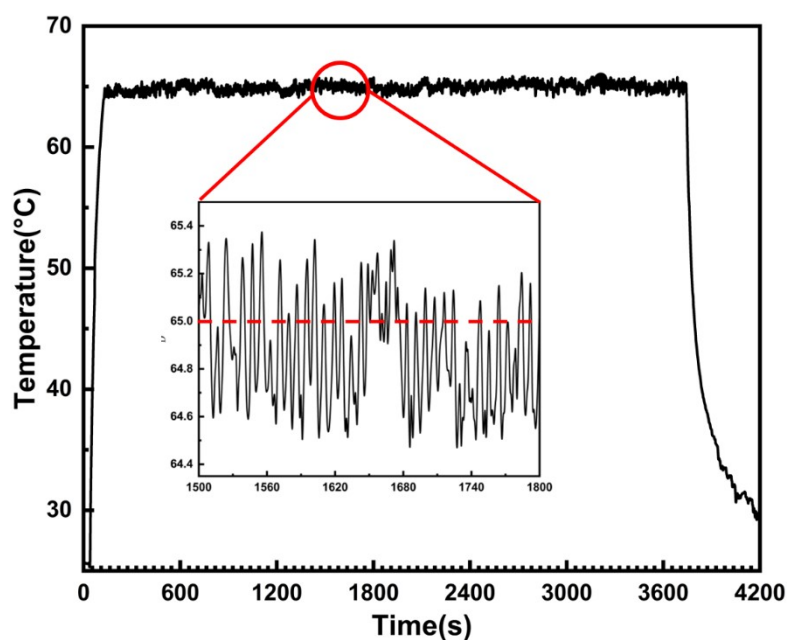

**Figure. S1.** Temperature control module stability test

**Table 1.** The List of LAMP primer sequences.

| ID | Target   | Name          | Primers (5'--3')                                |
|----|----------|---------------|-------------------------------------------------|
| 1  | Bt-11    | <b>F3</b>     | GCTGTAGCTGGCCTAATC                              |
|    |          | <b>B3</b>     | GGCCAAGGTATCTAATCAGC                            |
|    |          | <b>FIP</b>    | TATCTGTCTCAGGGGCAGACTCTCAACTGGTCTCCTCTCC        |
|    |          | <b>BIP</b>    | GCCAAGAAGGCGCAAGTCCATCCCATTGTGTATCTTTGTC        |
|    |          | <b>Loop F</b> | GTGTTCCCTCGGATCTCG                              |
|    |          | <b>Loop B</b> | ACCGCGAGTTGTTGTATCATA                           |
| 2  | Bt176    | <b>F3</b>     | CATGACGTGGGTTTCTGG                              |
|    |          | <b>B3</b>     | GCGAGAACACGAGAAGAG                              |
|    |          | <b>FIP</b>    | CCAAGGCTTCAAGGCCATTGACCGAGATCTGATGTTCTCT        |
|    |          | <b>BIP</b>    | GCTCCCTCTCTCCCTCTCATGTGGGAGGGAGAACTC            |
|    |          | <b>Loop F</b> | ATGGCGTGCATCAATGGA                              |
|    |          | <b>Loop B</b> | TCCTATAAAGTCGATACCACGC                          |
| 3  | GA21     | <b>F3</b>     | GCTGTAGTTGTTGGCTGT                              |
|    |          | <b>B3</b>     | CCTTTTAACTGATGTTTTCACTT                         |
|    |          | <b>FIP</b>    | TGGGGGATCCACTAGTTCTAGAG-GTGGAAAGTCCCAGTTGA      |
|    |          | <b>BIP</b>    | GCAGGTCGAGGTCATTCATATG-GACCAGGTAATCTTACCTTTG    |
|    |          | <b>Loop F</b> | CTGCACTTCTCTTTAGCATCC                           |
|    |          | <b>Loop B</b> | CTTGAGAAGAGAGTCGGGATAGTC                        |
| 4  | MIR162   | <b>F3</b>     | TGATTAGAGTCCCACAATT                             |
|    |          | <b>B3</b>     | TCATACAAAAAGGCCAGT                              |
|    |          | <b>FIP</b>    | AACATAGATGACACCGCGGGCGATAGAAAAAAAATATAGCG       |
|    |          | <b>BIP</b>    | ATTCAGTACATTA AAAACGTCGCCAAAAACA ACTACCACAAGGC  |
| 5  | MIR604   | <b>F3</b>     | AATCTGCCTATCGAGAAGA                             |
|    |          | <b>B3</b>     | CGGTTCTGTCAGTTCCAA                              |
|    |          | <b>FIP</b>    | GTGTGATCTGGCGTCCAGGAACCAGTGAATGGAGATG           |
|    |          | <b>BIP</b>    | CGCACGCAATTCAACAGAACCTTAATTCTCCGCTCATG          |
|    |          | <b>Loop B</b> | CGGGAACGACAATCTGA                               |
| 6  | MON810   | <b>F3</b>     | GGGCTACATCGAAGACAGC                             |
|    |          | <b>B3</b>     | GCAAGCAAATTCGGAAATGA                            |
|    |          | <b>FIP</b>    | GCCAGAGGGAACCAGTACCGATTTACCTGATCCGCTACAA        |
|    |          | <b>BIP</b>    | AAGTGTGCCACACAGCGAAAGTCCTCGTTCAGGTC             |
|    |          | <b>Loop F</b> | TTGACGGTCTCGTGCTTG                              |
|    |          | <b>Loop B</b> | CACCACTTCTCCTTGGACAT                            |
| 7  | MON863   | <b>F3</b>     | CCTTTTGATGAAGTGACAGG                            |
|    |          | <b>B3</b>     | AAGTCCAGGTTGGTTGGT                              |
|    |          | <b>FIP</b>    | ACTATTGACCCTACTTGTTCGGA-TAGGATCGGAAAGCTTGGTA    |
|    |          | <b>BIP</b>    | TAGGCCGTAACATTTAGCAAAAAACAGTGATAGGAGACTATCTAGCT |
|    |          | <b>Loop F</b> | TGGGTGTTCAACCCAAAAGTG                           |
| 8  | MON88017 | <b>F3</b>     | GCTAGCTTGATGGGGATCAG                            |
|    |          | <b>B3</b>     | CTGTAGATGGCACCGCG                               |
|    |          | <b>FIP</b>    | GGCAGTATGCCGAGTTGACC-TCGTTTCCCGCCTTCAGT         |
|    |          | <b>BIP</b>    | CTGGCCGCACGCAGGAAAAATA-CTGTCGTGTCTGACCAAGG      |

|           |                 |                  |                                               |
|-----------|-----------------|------------------|-----------------------------------------------|
|           |                 | <b>Loop B</b>    | GGGCGAATCAGAAAGGGCGT                          |
| <b>9</b>  | <b>MON89034</b> | <b>F3</b>        | TTGCTTTCGCCTATAAATACG                         |
|           |                 | <b>B3</b>        | GAAACTTTGGGTTGAAATGAAAT                       |
|           |                 | <b>FIP</b>       | GTAGATGTCCGCAGCGTTATTATAAACGGATCGTAATTTGTTCGT |
|           |                 | <b>BIP</b>       | ATTGACCATCATACTCATTGCATCCCCAATACTCAAAAAATAAC  |
| <b>10</b> | <b>T25</b>      | <b>F3</b>        | GGAACGACTCAATGACAAGA                          |
|           |                 | <b>B3</b>        | AGAGGCATCTTCAACGATG                           |
|           |                 | <b>FIP</b>       | GGAATCCGAGGAGGTTCCG-ATCTTCGTCAACATGGTGG       |
|           |                 | <b>BIP</b>       | TTGCCAGCTATCTGTCACTT-GCAATGATGGCATTGTAGG      |
|           |                 | <b>Loop F</b>    | TTGGAGTAGACAAGCGTGTC                          |
|           |                 | <b>Loop B</b>    | TAGTGGAAAAGGAAGGTGGC                          |
| <b>11</b> | <b>3272</b>     | <b>F3(PMI)</b>   | TCCCGATTCCAGTGGATGA                           |
|           |                 | <b>B3(PMI)</b>   | ACAGTCACCGGTGATTTCGT                          |
|           |                 | <b>FIP(PMI)</b>  | ACAAAATGGCGGCACTCTGCTGCCTTCTCGCTGCATGAC       |
|           |                 | <b>BIP(PMI)</b>  | CGTCGAAGGCGATGCAACGTGGCGGCAATAAACGCTGAT       |
|           |                 | <b>F3(797E)</b>  | AGGCATCTGGTGGGACAC                            |
|           |                 | <b>B3(797E)</b>  | TCCTGCTTGGACCCGAAG                            |
|           |                 | <b>FIP(797E)</b> | GGAAGCTGGCGGTATCCAGATCGCCAGAAGATCCCCGAGT      |
|           |                 | <b>BIP(797E)</b> | CTCGATGGGCTACGACCCGTACCGTGCCCTTCTGGTAG        |
| <b>12</b> | <b>59122</b>    | <b>F3</b>        | CGAACGATTCAGATGGCA                            |
|           |                 | <b>B3</b>        | TTGCGGTTCTGTCAGTTC                            |
|           |                 | <b>FIP</b>       | CCTTCACTTTCTTCCGTCCCTTCTCGTACTCACCAACATTG     |
|           |                 | <b>BIP</b>       | TTAAACTGAAGGCGGAAACGAGTCATAACGTGACTCCCTTAA    |
|           |                 | <b>Loop F</b>    | TGAGCCAATCACAGGTGC                            |
|           |                 | <b>Loop B</b>    | CAATCTGATCATGAGCGGAGA                         |
